# Supplementary material for: Progression from Nonalcoholic Fatty Liver to Nonalcoholic Steatohepatitis Cirrhosis Confirmed by Liver Histology after 14 Years
Source: PubMed Central journal article supplement — Intern Med. 2020 Dec 7;60(9):1397–401. doi: 10.2169/internalmedicine.6118-20 (PMC8170238; doi:10.2169/internalmedicine.6118-20), 2020-12-07
Supplement: 1349-7235-60-1397-s001.pdf [file 1349-7235-60-1397-s001.pdf]

**Supplementary Table 1** Histological evaluation of biopsied tissues

|            | <b>First Biopsy</b> | <b>Second Biopsy</b> | <b>Third Biopsy</b> |
|------------|---------------------|----------------------|---------------------|
| Stage      | 1                   | 3                    | 4                   |
| Grade      | 0                   | 2                    | 2                   |
| Steatosis  | 3                   | 2                    | 2                   |
| Ballooning | 0                   | 2                    | 2                   |
| NAS        | 3                   | 6                    | 6                   |

NAS [NAFLD activity score]
